# Supplementary material for: Pro-gastrin releasing peptide as a tumor marker of medullary thyroid carcinoma: a comparative bivariate meta-analysis
Source: publisher site journal article supplement (doi:10.1515/cclm-2025-0867), 2025-11-07
Supplement: Supplementary file 1 [file j_cclm-2025-0867_suppl_001.docx]

**Supplemental Table 1.** Calcitonin: diagnostic characteristics of the included studies (n = 4, 1064 patients)

| Study | Patients | TP | FN | FP | TN | Sens. | Spec. | Threshold | Assay |
| --- | --- | --- | --- | --- | --- | --- | --- | --- | --- |
| Han XD 2021 | 360 | 104 | 1 | 14 | 241 | 99.0 | 94.5 | 10 | ECLIA |
| Miao 2023 | 236 | 92 | 8 | 10 | 126 | 92.0 | 92.6 | 7.97 | ECLIA |
| Martin Fernandes 2025 | 64 | 5 | 0 | 4 | 55 | 92.0 | 82.7 | 138.4 | N.R. |
| Schonebaum 2025 | 404 | 32 | 0 | 65 | 307 | 100 | 92.8 | 10 | CLEIA |
